# Supplementary material for: Carbon nanofibers by pyrolysis of self-assembled perylene diimide derivative gels as supercapacitor electrode materials
Source: Royal Society of Chemistry journal article supplement (doi:10.1039/c5ta03546e), 2015-01-01
Supplement: c5ta03546e1.pdf [file c5ta03546e1.pdf]

## Supporting Information

### Carbon nanofibers by pyrolysis of self-assembled perylene diimide derivative gels as supercapacitor electrode materials

*Xia Liu,<sup>a,b,c</sup> Aled Roberts<sup>c,d</sup>, Adham Ahmed,<sup>c</sup> Zhenxin Wang,<sup>\*a</sup> Xu Li,<sup>d</sup> and Haifei Zhang<sup>\*c</sup>*

<sup>a</sup> X. Liu, Prof. Z. Wang

State Key Laboratory of Electroanalytical Chemistry

Changchun Institute of Applied Chemistry

Chinese Academy of Sciences

5625 Renmin Street, Changchun, Jilin 130022, P. R. China

E-mail: [wangzx@ciac.ac.cn](mailto:wangzx@ciac.ac.cn)

<sup>b</sup> X. Liu

University of Chinese Academy of Sciences

Beijing 100039, P.R. China

<sup>c</sup> X. Liu, A. Roberts, Dr. A. Ahmed, Dr. H. Zhang

Department of Chemistry

University of Liverpool

Oxford Street, Liverpool L69 7ZD, United Kingdom

E-mail: [zhanghf@liv.ac.uk](mailto:zhanghf@liv.ac.uk)

<sup>d</sup> A. D. Roberts, Dr. X. Li

Institute of Materials Research and Engineering

A\*STAR (Agency for Science, Technology and Research)

3 Research Link 117602, Singapore

**Table S1.** Elemental analysis of the carbonized samples.

| sample       | C (%) | H (%) | N (%) |
|--------------|-------|-------|-------|
| K + GdL      | 44.33 | 0.79  | 1.72  |
| N + GdL      | 65.57 | 1.36  | 6.81  |
| T + GdL      | 88.09 | 1.64  | 2.86  |
| K + MM + GdL | 42.74 | 1.14  | 3.72  |
| N + MM + GdL | 65.02 | 0.92  | 4.97  |
| T + MM + GdL | 84.84 | 1.27  | 4.06  |

**Table S2.** Comparison of specific capacitance with different scan rates by CV testing for the F-127-templated CNF electrode with the CNF area loading of 0.14 mg cm<sup>-2</sup> and 1.13mg cm<sup>-2</sup>.

| Scan rate (mV s <sup>-1</sup> ) | Capacitance (F g <sup>-1</sup> ) |                          |
|---------------------------------|----------------------------------|--------------------------|
|                                 | 0.14 mg cm <sup>-2</sup>         | 1.13 mg cm <sup>-2</sup> |
| 2                               | 320                              | 210                      |
| 5                               | 244                              | 200                      |
| 10                              | 215                              | 186                      |
| 20                              | 172                              | 177                      |
| 50                              | 144                              | 161                      |
| 100                             | 122                              | 142                      |
| 200                             | 118                              | 107                      |

**Table S3.** Comparison of specific capacitance with different current densities by Galvanostatic charge/discharge testing for the F-127-templated CNF electrode with the CNF area loading of  $0.14 \text{ mg cm}^{-2}$  and  $1.13 \text{ mg cm}^{-2}$ .

| Current density ( $\text{A g}^{-1}$ ) | Capacitance ( $\text{F g}^{-1}$ ) |                           |
|---------------------------------------|-----------------------------------|---------------------------|
|                                       | $0.14 \text{ mg cm}^{-2}$         | $1.13 \text{ mg cm}^{-2}$ |
| 1                                     | 192                               | 180                       |
| 2                                     | 164                               | 170                       |
| 5                                     | 148                               | 157                       |
| 10                                    | 131                               | 143                       |
| 20                                    | 105                               | 121                       |

**Table S4.** Comparison of the specific capacitance of the CNF-based electrodes in the literature.

| Electrode                                                 | Electrolyte                          | Current density or scan rate               | Electrode system     | Capacitance (F g <sup>-1</sup> ) | Ref       |
|-----------------------------------------------------------|--------------------------------------|--------------------------------------------|----------------------|----------------------------------|-----------|
| Graphene oxide - CNT/CNF                                  | 0.5 M NaSO <sub>4</sub>              | 0.5 A g <sup>-1</sup>                      | three-electrode cell | 120.5                            | 1         |
| Polygonal carbon nanofibers                               | 1 M NaSO <sub>4</sub>                | 3 A g <sup>-1</sup>                        | three-electrode cell | 186                              | 2         |
| Nitrogen-doped hollow activated carbon nanofibers         | 6.0 M KOH                            | 0.2 A g <sup>-1</sup>                      | three-electrode cell | 197                              | 3         |
| Mesoporous carbon nanofibers                              | 6.0 M KOH                            | 0.5 A g <sup>-1</sup> /5 A g <sup>-1</sup> | three-electrode cell | 276/206                          | 4         |
| Mesoporous CNFs                                           | 6.0 M KOH                            | 0.5 A g <sup>-1</sup>                      | three-electrode cell | 280                              | 5         |
| nitrogen-doped porous nanofibers                          | 6.0 M KOH                            | 1 A g <sup>-1</sup>                        | three-electrode cell | 202                              | 6         |
| N-rich composite of CNTs and carbon derived from melamine | 1.0 M H <sub>2</sub> SO <sub>4</sub> | 0.05 A g <sup>-1</sup>                     | three-electrode cell | 167                              | 7         |
| N-enriched carbon from melamine_mica                      | 1.0 M H <sub>2</sub> SO <sub>4</sub> | 0.05 A g <sup>-1</sup>                     | two-electrode cell   | 115                              | 8         |
| Polyaniline-Graphene Oxide Composites materials           | 2.0 M H <sub>2</sub> SO <sub>4</sub> | 1 A g <sup>-1</sup>                        | three-electrode cell | 210                              | 9         |
| polyacrylonitrile-based carbon nanofiber paper            | 1.0 M H <sub>2</sub> SO <sub>4</sub> | 0.5 A g <sup>-1</sup>                      | two-electrode cell   | 200                              | 10        |
| F-127-templated CNFs                                      | 2.0 M H <sub>2</sub> SO <sub>4</sub> | 4 A g <sup>-1</sup>                        | three-electrode cell | 226                              | This work |

## Reference

1. H.-C. Hsu, C.-H. Wang, Y.-C. Chang, J.-H. Hu, B.-Y. Yao and C.-Y. Lin, *J. Phys. Chem. Solids*, 2015, DOI: [10.1016/j.jpcs.2015.04.010](https://doi.org/10.1016/j.jpcs.2015.04.010)
2. P. He, L. Liu, W. Song, G. Xiong, T. S. Fisher and T. Chen, *RSC Adv.*, 2015, **5**, 31837-31844.
3. Q. Xu, X. Yu, Q. Liang, Y. Bai, Z.-H. Huang and F. Kang, *J. Electroanal. Chem.*, 2015, **739**, 84-88.
4. X.-Q. Zhang, Q. Sun, W. Dong, D. Li, A.-H. Lu, J.-Q. Mu and W.-C. Li, *J. Mater. Chem. A*, 2013, **1**, 9449-9455.
5. W. Li, F. Zhang, Y. Dou, Z. Wu, H. Liu, X. Qian, D. Gu, Y. Xia, B. Tu and D. Zhao, *Adv. Energy Mater.*, 2011, **1**, 382-386.
6. L.-F. Chen, X.-D. Zhang, H.-W. Liang, M. Kong, Q.-F. Guan, P. Chen, Z.-Y. Wu and S.-H. Yu, *ACS nano*, 2012, **6**, 7092-7102.
7. G. Lota, K. Lota and E. Frackowiak, *Electrochem. Commun.*, 2007, **9**, 1828-1832.
8. D. Hulicova-Jurcakova, M. Kodama, S. Shiraiishi, H. Hatori, Z. H. Zhu and G. Q. Lu, *Adv. Funct. Mater.*, 2009, **19**, 1800-1809.
9. K. Zhang, L. L. Zhang, X. Zhao and J. Wu, *Chem. Mater.*, 2010, **22**, 1392-1401.
10. E. Ra, E. Raymundo-Piñero, Y. Lee and F. Béguin, *Carbon*, 2009, **47**, 2984-2992.

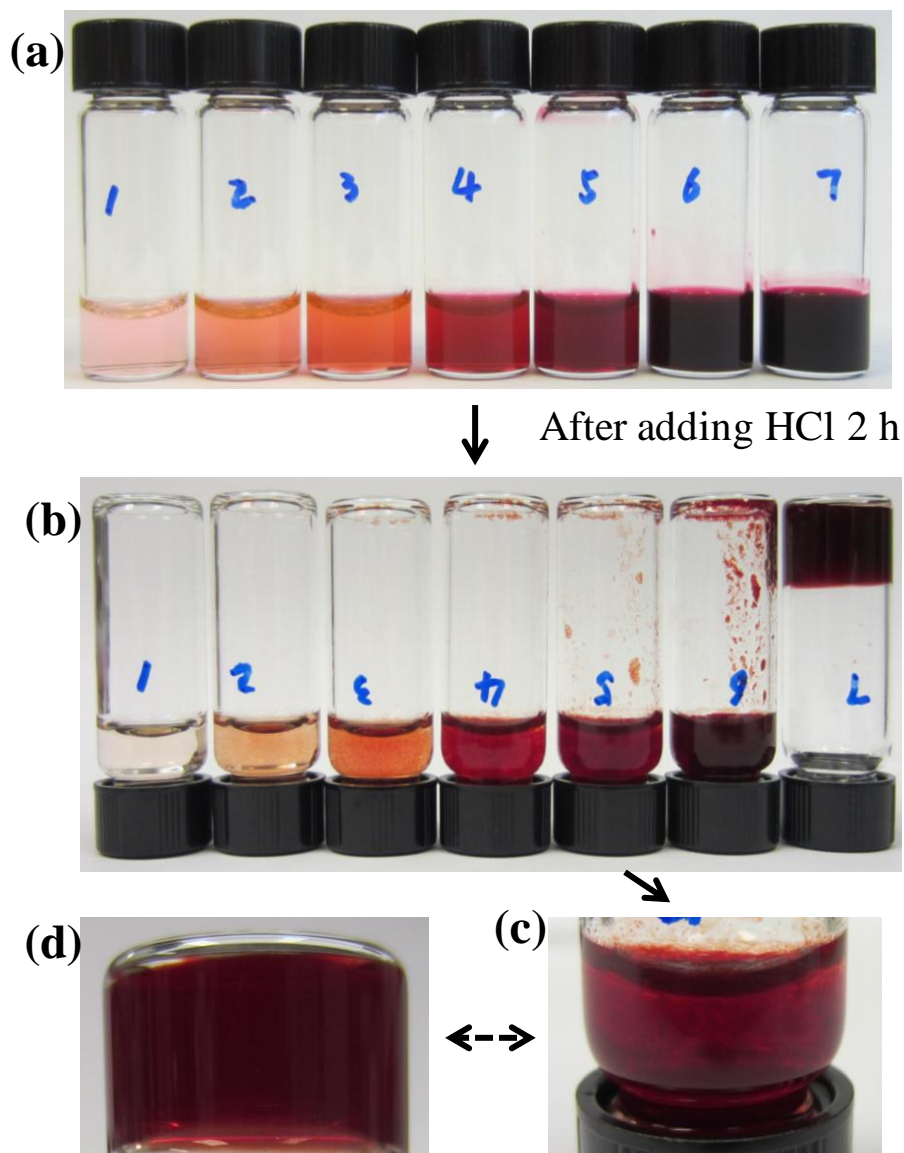

**Fig. S1.** (a) The photos of PI dissolved in TEA solutions (PI:TEA = 1:6) with different PI concentrations (from left to right: 0.01, 0.05, 0.1, 0.5, 1, 5, 20 mM). (b) Brittle gels formed for some of the solutions after adding 120  $\mu\text{l}$  4 M HCl for 2 h. (c) The enlarged photo for the sample 5 (1 mM PI) to show pieces of the gels formed. (d) The photo shows a uniform gel formed with sample 5 after adding 13  $\text{mg cm}^{-3}$  GdL for 2 h.

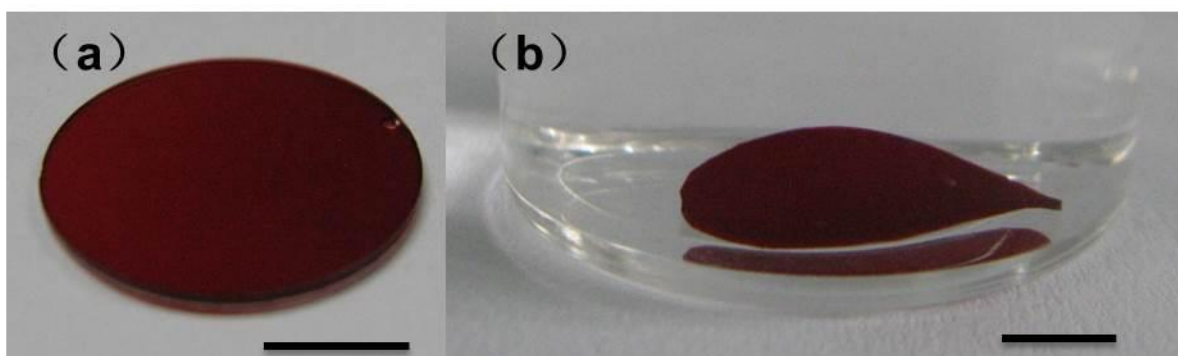

**Fig. S2.** (a) The photo of the hydrogel film on the glass slide and (b) the photo of the hydrogel film in water. The hydrogel film was fabricated by dropping 50  $\mu\text{L}$  the mixture solution of PI solution and 13 mg/ml GdL between two glass slides (diameter 1.3 cm). The scale bar of inset photos represents 5 mm.

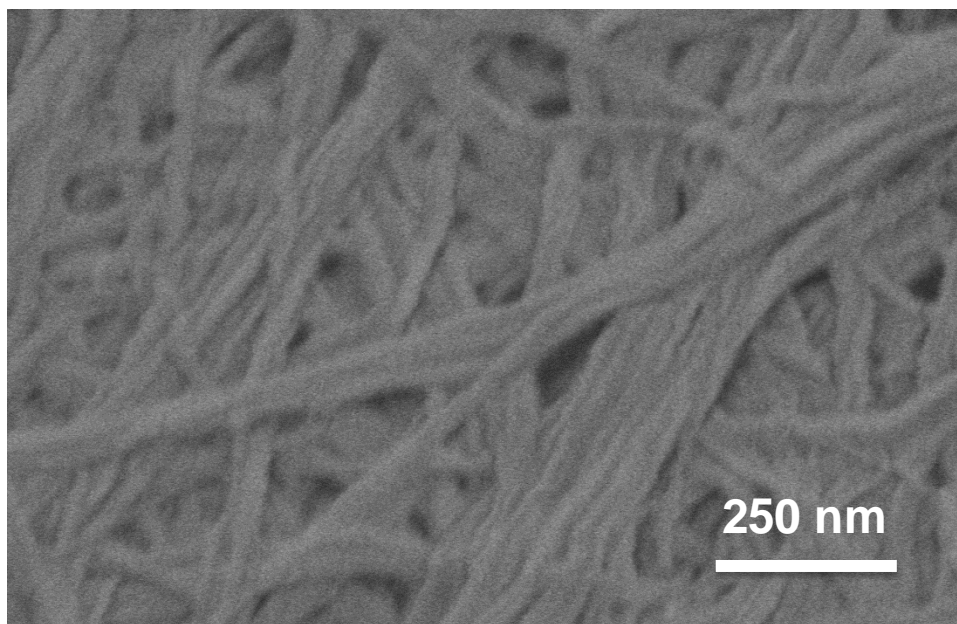

**Fig. S3.** The nanofibers observed for freeze-dried T + GdL sample.



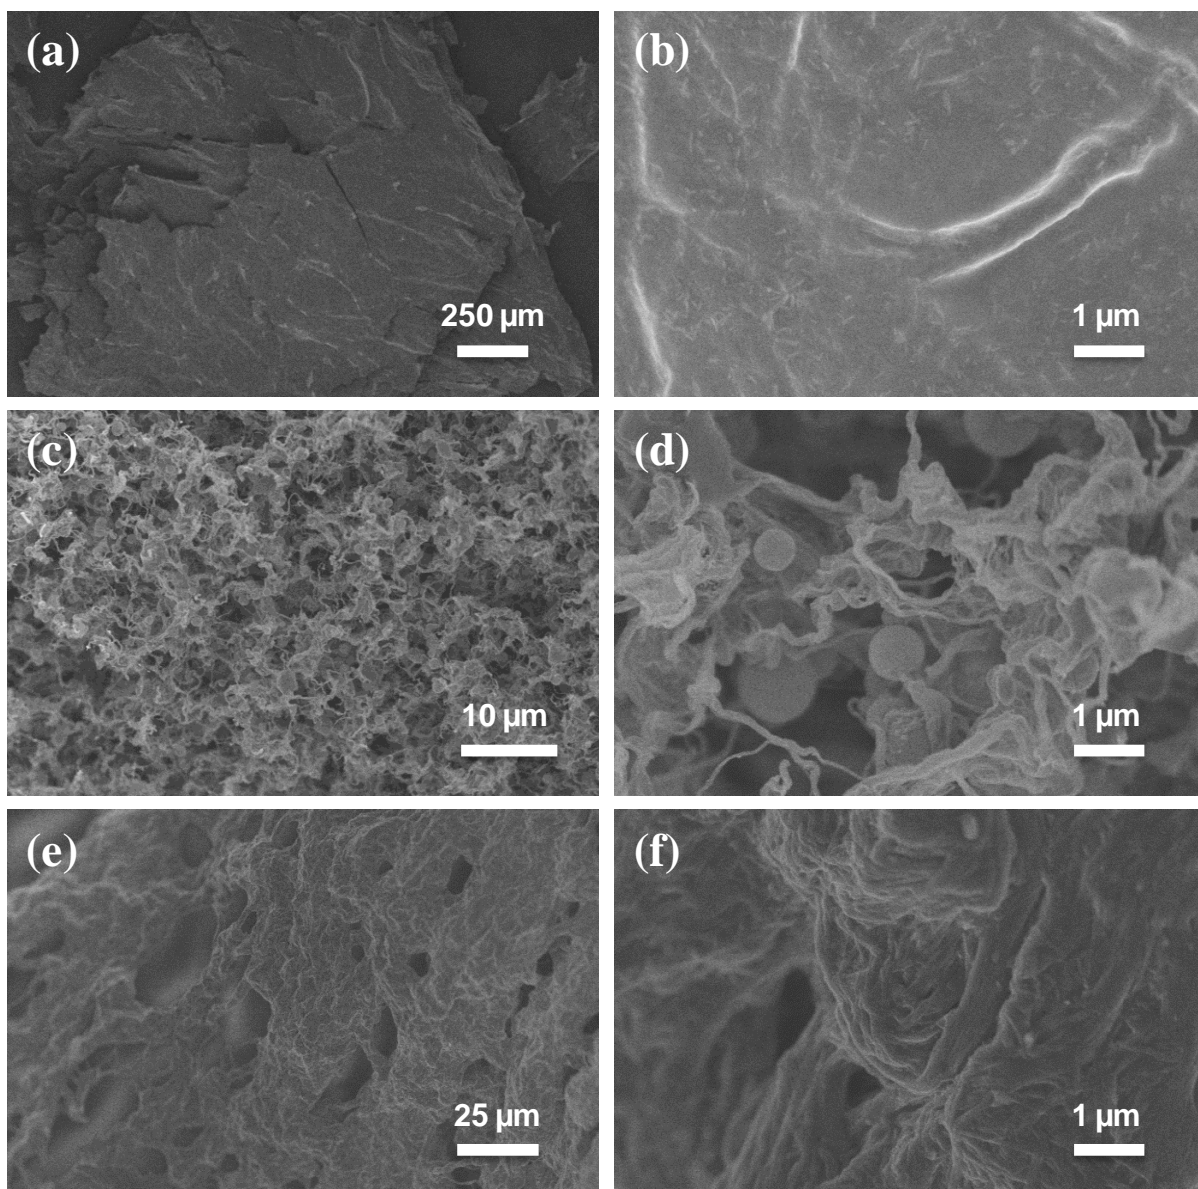

**Fig. S4.** SEM images of carbonized samples for N + GdL (a/b), K + GdL (c/d), T + GdL (e/f).

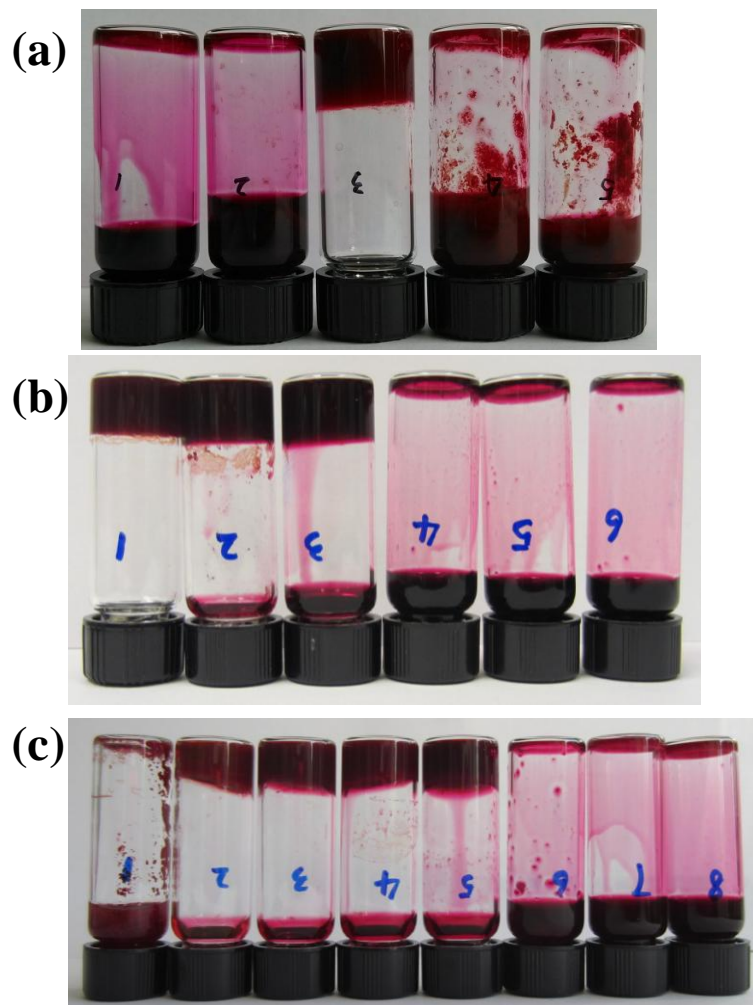

**Fig. S5.** Photos showing the gel formation of PI in different base solution, by mixing equal volume of PI (20 mM) and MM (40 mM) solutions after 24 hours. (a) PI dissolved in  $K_2SnO_3$  solution with different concentrations (from left to right: 12, 9, 6, 4, 3  $mg\ cm^{-3}$ ). The gels formed with 4  $mg\ cm^{-3}$  and 3  $mg\ cm^{-3}$   $K_2SnO_3$ -PI solutions were very brittle, weak, and could not hold to the bottle bottom. (b) TEA solution with different concentrations (from left to right PI:TEA=1:1, 1:2, 1:3, 1:4, 1:5, 1:6). (c) NaOH solution with different concentrations (from left to right: 0.01, 0.02, 0.03, 0.04, 0.05, 0.06, 0.07, 0.08 M).

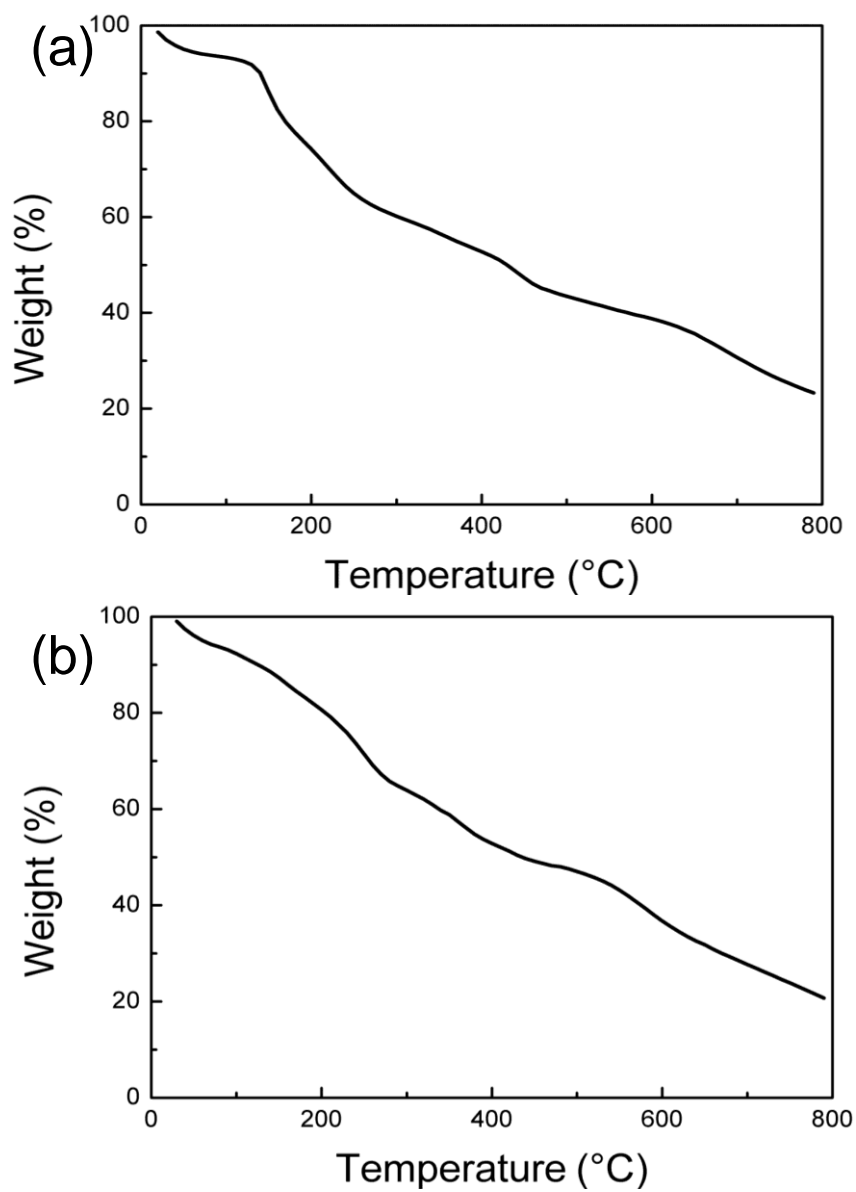

**Fig. S6.** TGA curves of samples K + MM + GdL (a) and T + MM + GdL (b), which were washed using water, acetone and cyclohexane. (heating rate = 5 °C min<sup>-1</sup> under a nitrogen atmosphere).

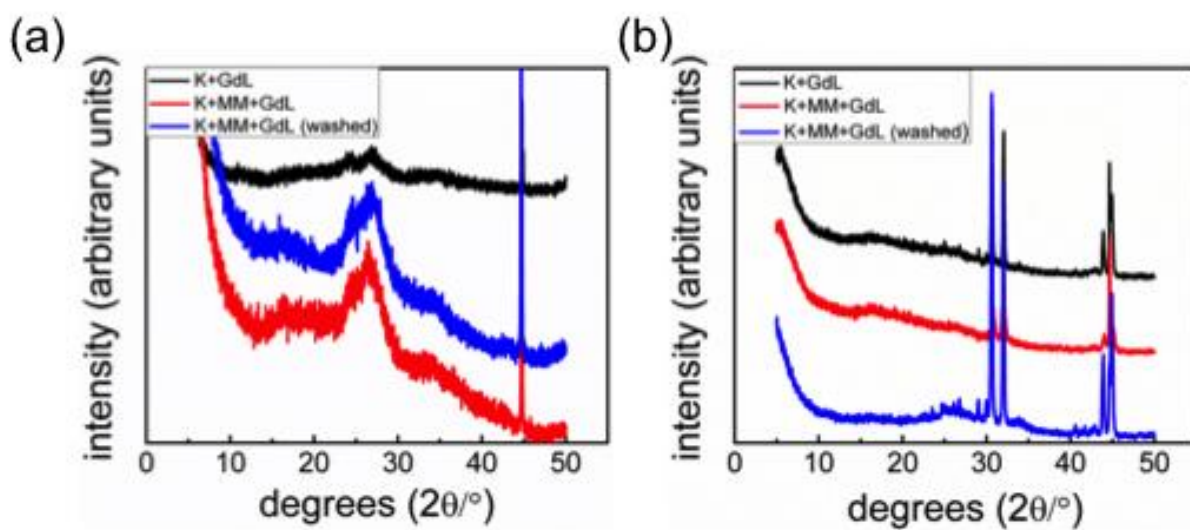

**Fig. S7.** PXRD patterns of K + GdL, K + MM + GdL and K + MM + GdL after washing treatment before (a) and after (b) carbonization.

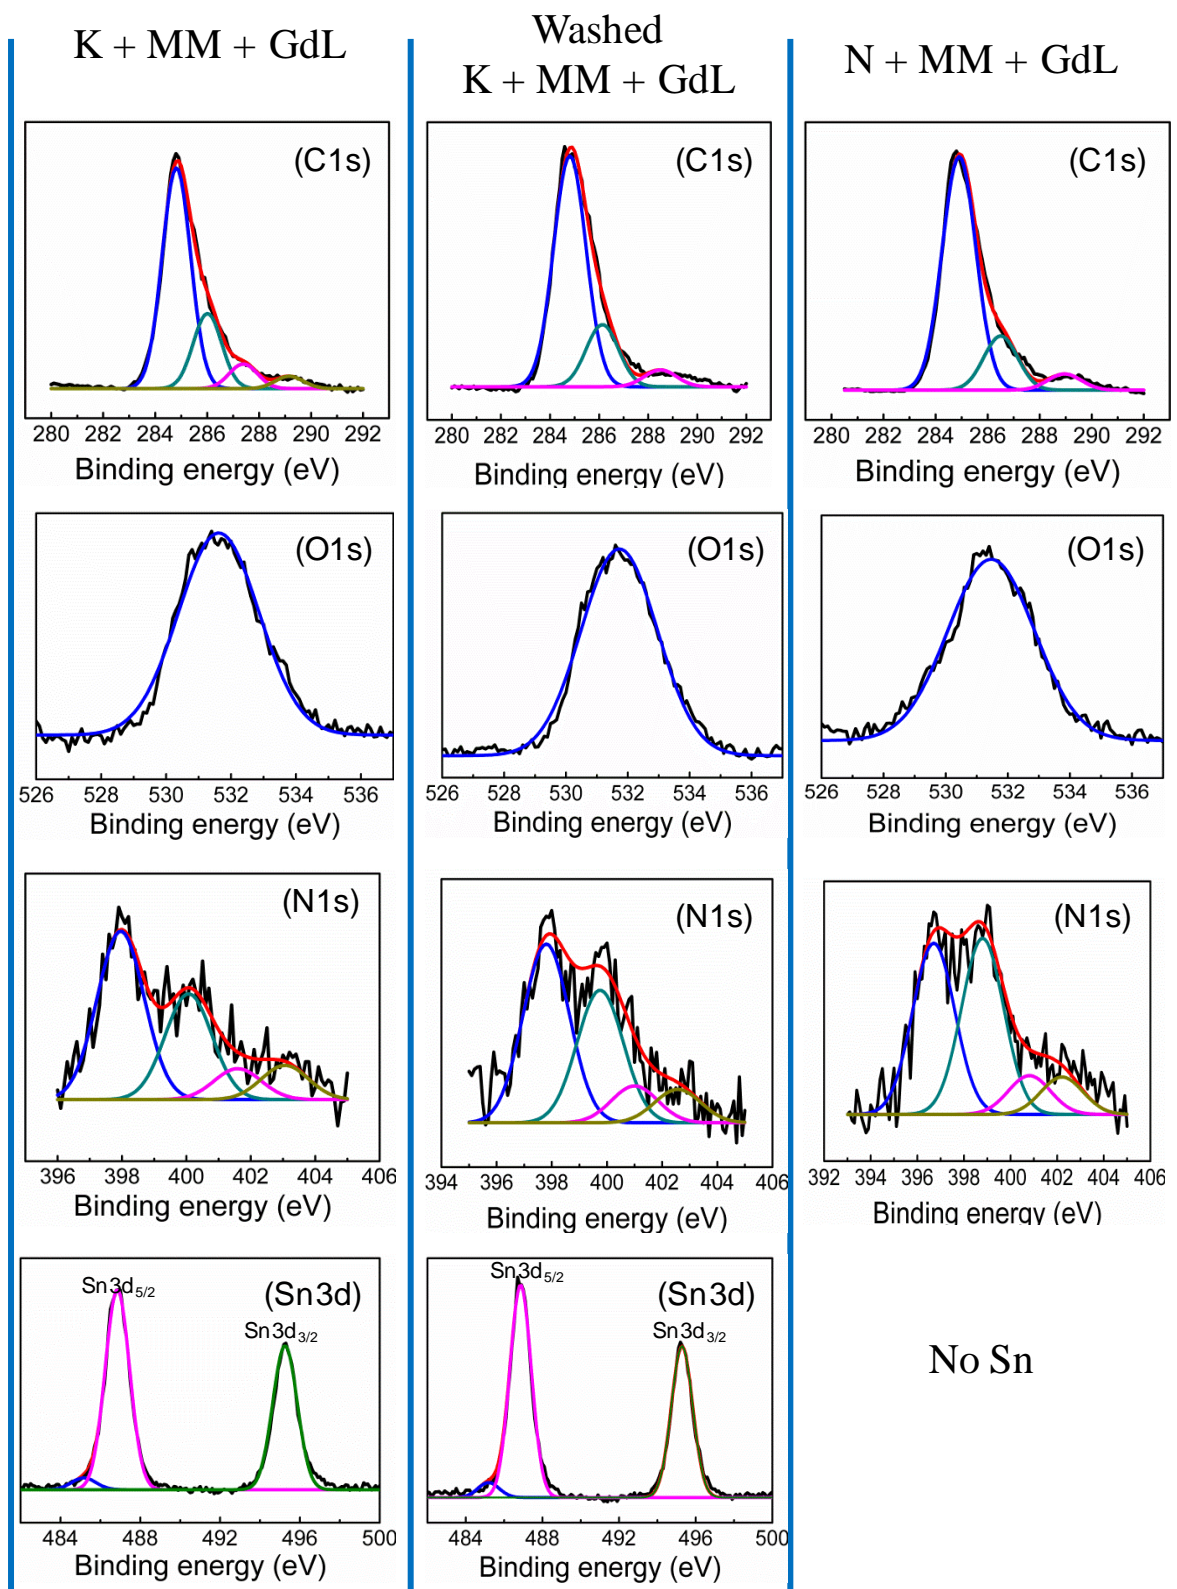

**Fig. S8.** XPS data comparison of the calcined samples K + MM + GdL, washed K + MM + GdL, and N + MM + GdL for the closer view and peak fittings for C1s, O1s, N1s, and Sn3d.



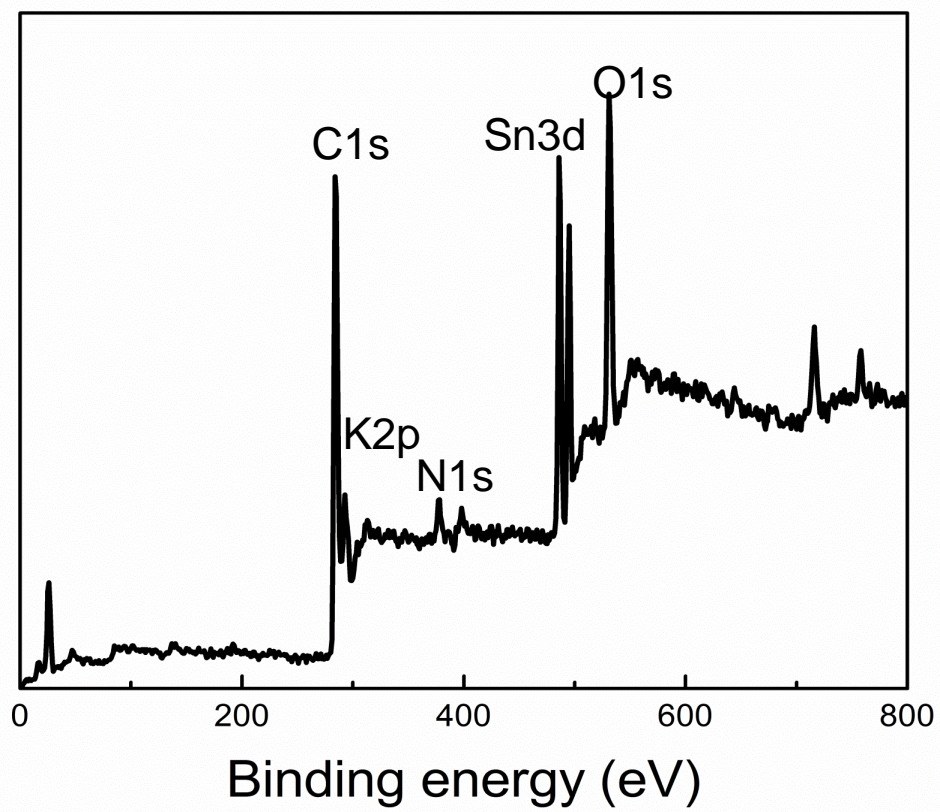

**Fig. S9.** XPS spectrum of the sample K + MM + GdL after washing treatment.

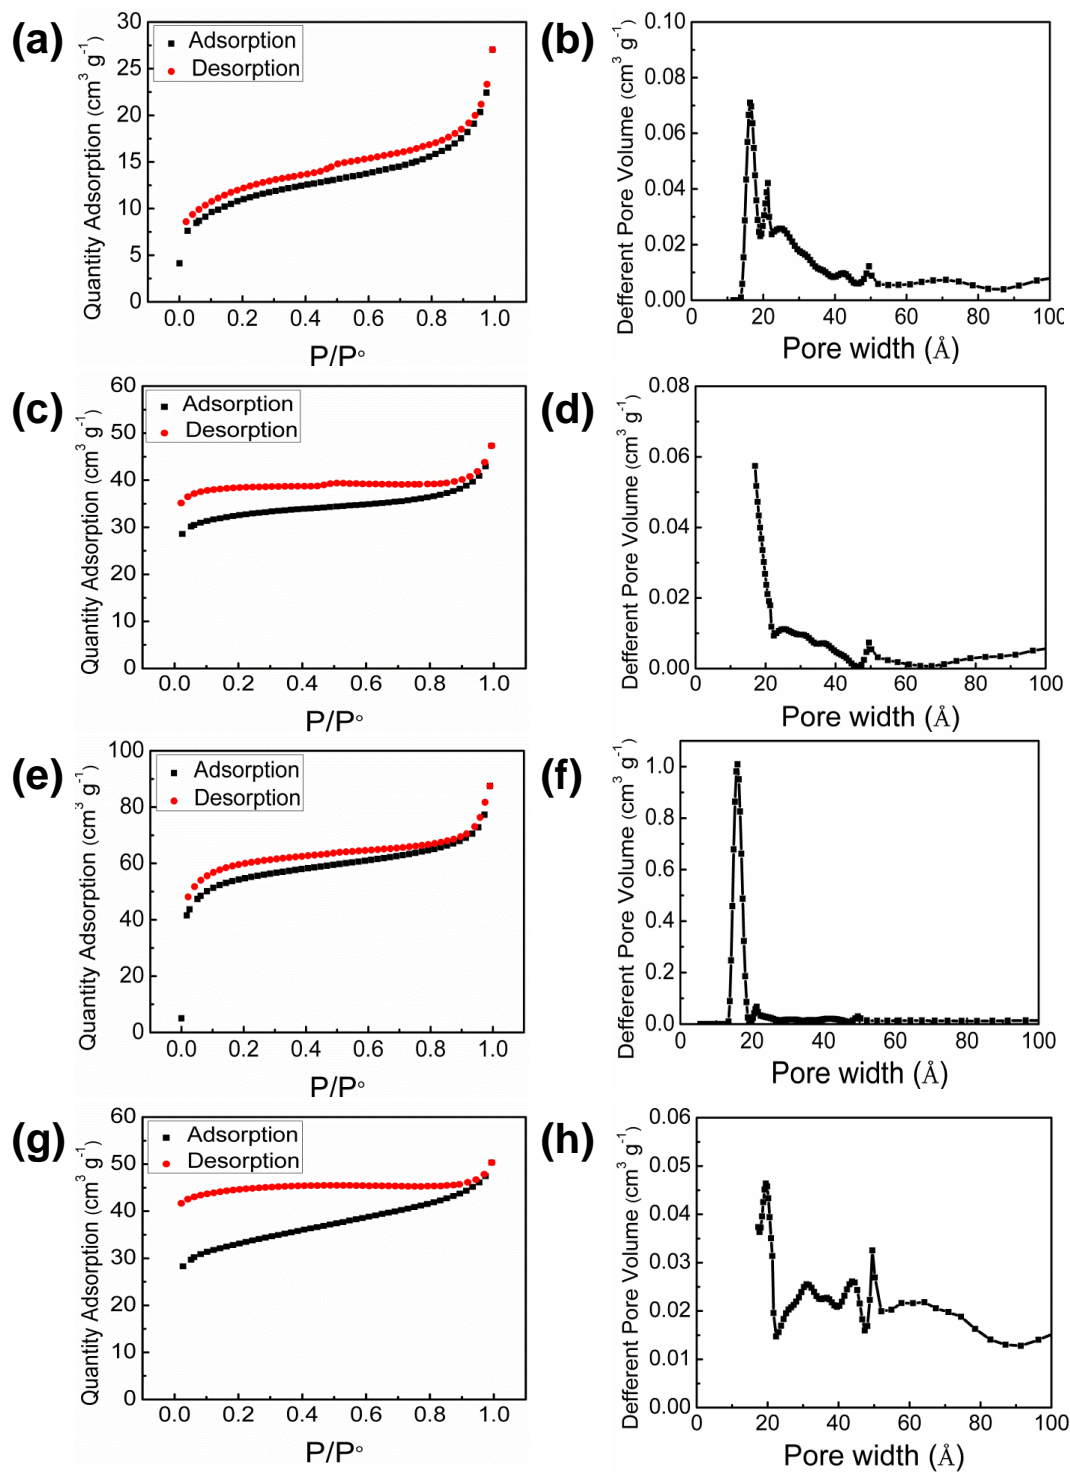

**Fig. S10.** N<sub>2</sub> gas sorption isotherm curves and the corresponding DFT pore size distribution for the carbonized sample K + GdL (a, b), K + MM + GdL (c, d), N + MM + GdL (e, f) and T + MM + GdL (g, h).

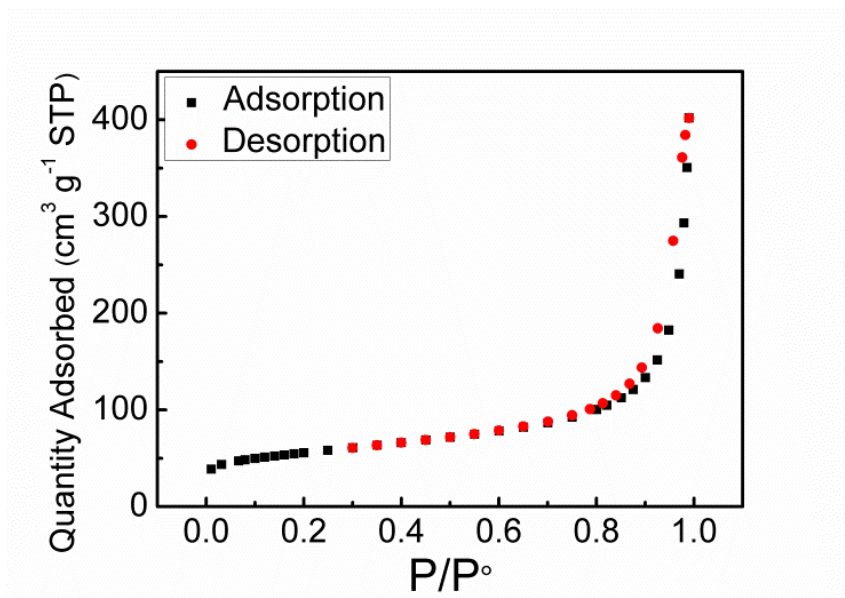

**Fig. S11.** Here is an example of the N<sub>2</sub> gas sorption isotherm curve of the CNF sample prepared by washing the T+MM+GdL gel and subsequently pyrolyzing. The washed sample has a higher surface area than that of the un-washed sample (178 m<sup>2</sup> g<sup>-1</sup> vs 124 m<sup>2</sup> g<sup>-1</sup>).



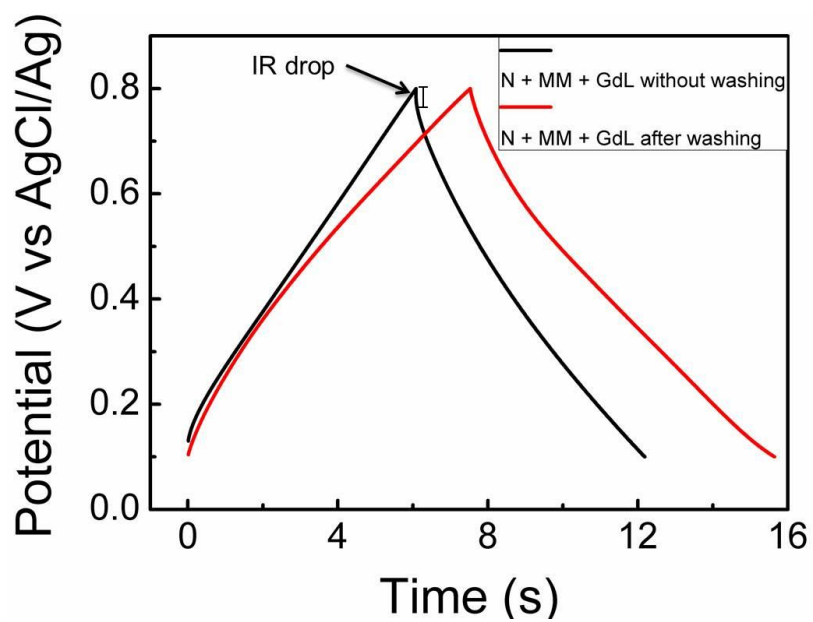

**Fig. S12.** Constant current charge-discharge curves of sample N+MM+GdL without (black) and with washing process (red). The Nafion-glued CNFs as working electrode, Pt sheet as counter electrode, and Ag/AgCl electrode as reference electrode.

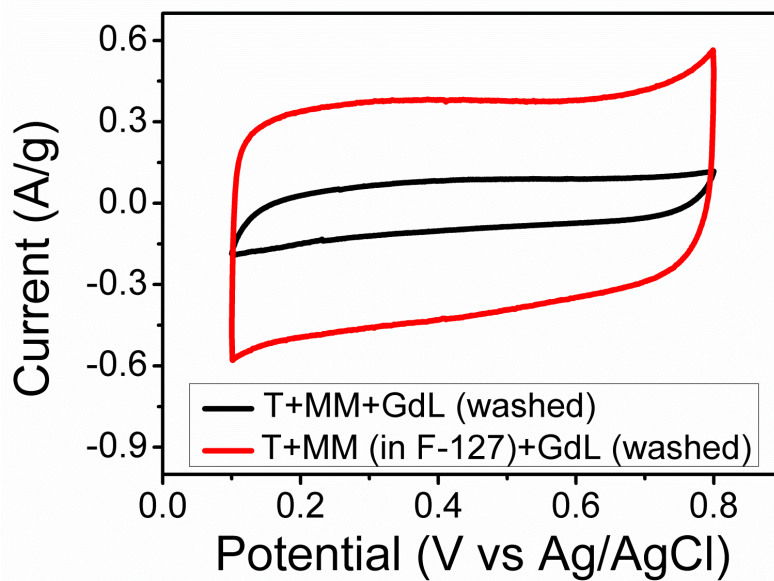

**Fig. S13.** Comparison of cyclic voltammograms for F-127 templated and non-templated CNFs prepared from TEA (T) solution. Cyclic voltammograms recorded in 2 M  $\text{H}_2\text{SO}_4$  by using the CNFs coated glassy carbon electrode as working electrode with polytetrafluoroethene (PTFE) as glue, Pt wire as counter electrode, and Ag/AgCl electrode as reference electrode. The scan rate is  $1 \text{ mV s}^{-1}$ .

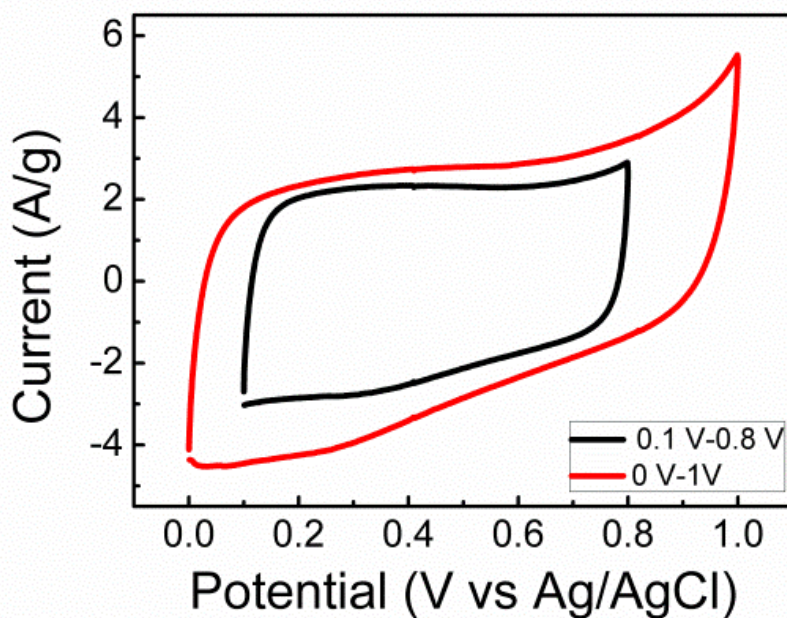

**Fig. S14.** Cyclic voltammograms recorded in 2 M H<sub>2</sub>SO<sub>4</sub> in the 0.1-0.8 V and 0-1 V windows by using CNFs coated glassy carbon electrodes as working electrode, Pt sheet as counter electrode, and Ag/AgCl electrode as reference electrode. The scan rate is 10 mV s<sup>-1</sup>. After 0.9 V, there is a hump in current, which corresponds to irreversible chemical reactions.

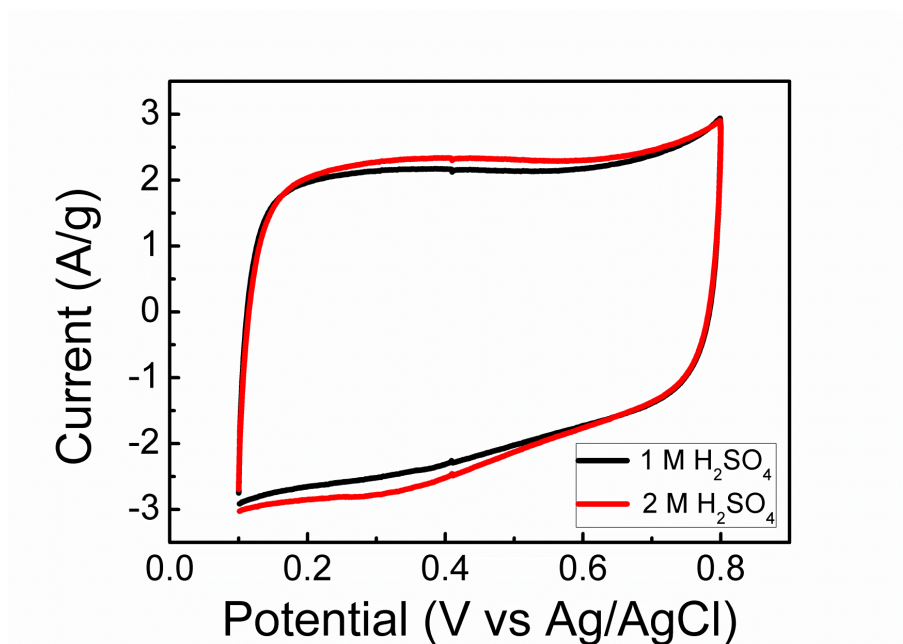

**Fig. S15.** Cyclic voltammograms recorded in 1 M H<sub>2</sub>SO<sub>4</sub> and 2 M H<sub>2</sub>SO<sub>4</sub> in the 0.1-0.8 V by using the F-127-templated CNFs coated glassy carbon electrodes as working electrode, Pt sheet as counter electrode, and Ag/AgCl electrode as reference electrode. The scan rate is 10 mV s<sup>-1</sup>.

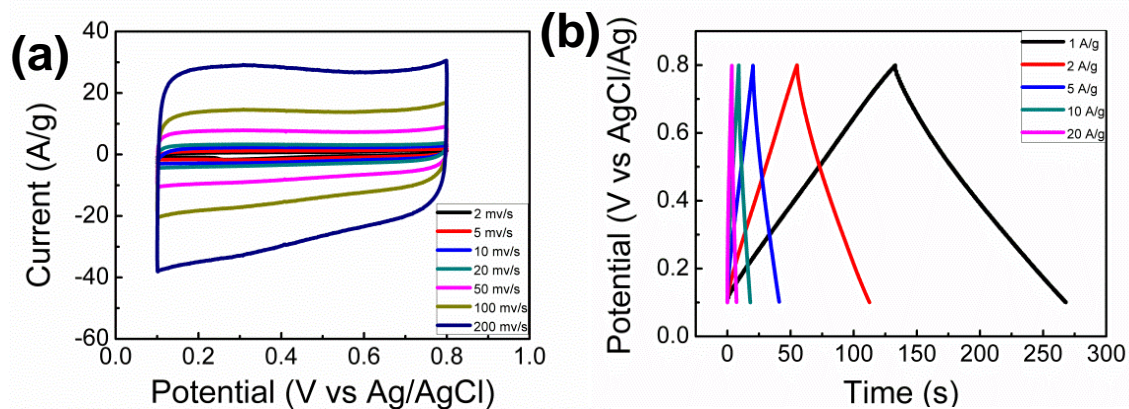

**Fig. S16.** (a) Cyclic voltammograms at different scanning rates. (b) Constant current charge-discharge curves at different current density. The Nafion-glued CNFs as working electrode with a CNF area loading of  $0.14 \text{ mg cm}^{-2}$ , Pt sheet as counter electrode, and Ag/AgCl electrode as reference electrode.
